# Supplementary material for: ﻿Assessing ploidy levels and karyotype structure of the fire ant Solenopsissaevissima Smith, 1855 (Hymenoptera, Formicidae, Myrmicinae)
Source: PubMed Central journal article supplement (PMC10696605; doi:10.3897/compcytogen.17.100945), 2023-04-11
Supplement: comparative_cytogenetics-17--059_article-100945__-s001.pdf [file comparative_cytogenetics-17--059_article-100945__-s001.pdf]

Supplementary tables

**Table S1** - Results from the karyomorphometrical analyses of *Solenopsis saevissima*  $n = 16$  chromosomes. TL: total length; L: long arm length; S: short arm length; RL: relative length;  $r$ : arm ratio ( $= L/S$ ); m: metacentric; sm: submetacentric; st: subtelocentric.

|           | TL        | L         | S         | RL         | $r$       | Morphology |
|-----------|-----------|-----------|-----------|------------|-----------|------------|
| 1         | 4.46±1.03 | 2.5±0.6   | 1.96±0.51 | 8.73±0.54  | 1.3±0.24  | m          |
| 2         | 3.97±0.85 | 2.21±0.48 | 1.76±0.47 | 7.81±0.52  | 1.31±0.4  | m          |
| 3         | 3.86±0.91 | 2.1±0.46  | 1.76±0.47 | 7.54±0.421 | 1.22±0.16 | m          |
| 4         | 3.54±0.81 | 2.03±0.43 | 1.5±0.53  | 6.95±0.45  | 1.51±0.72 | m          |
| 5         | 3.46±0.94 | 1.94±0.53 | 1.52±0.43 | 6.73±0.7   | 1.28±0.14 | m          |
| 6         | 3.43±0.8  | 1.85±0.49 | 1.58±0.34 | 6.73±0.67  | 1.16±0.16 | m          |
| 7         | 3.1±0.82  | 1.75±0.5  | 1.34±0.38 | 6.04±0.69  | 1.34±0.3  | m          |
| 8         | 3.04±0.71 | 1.69±0.38 | 1.35±0.45 | 5.96±0.6   | 1.4±0.75  | m          |
| 9         | 2.71±0.96 | 1.47±0.44 | 1.23±0.53 | 5.23±1.08  | 1.24±0.2  | m          |
| 10        | 2.41±0.75 | 1.33±0.41 | 1.08±0.38 | 4.73±1.07  | 1.26±0.31 | m          |
| 11        | 3.46±0.76 | 2.42±0.61 | 1.04±0.22 | 6.84±1.09  | 2.35±0.53 | sm         |
| 12        | 3.15±0.72 | 2.12±0.52 | 1.02±0.22 | 6.2±0.73   | 2.07±0.29 | sm         |
| 13        | 2.6±0.65  | 1.79±0.47 | 0.8±0.22  | 5.08±0.49  | 2.33±0.64 | sm         |
| 14        | 2.3±0.56  | 1.55±0.41 | 0.75±0.18 | 4.56±0.83  | 2.06±0.36 | sm         |
| 15        | 3.02±1.11 | 2.41±0.96 | 0.6±0.18  | 5.84±1.47  | 3.98±1.04 | st         |
| 16        | 2.53±0.63 | 1.91±0.57 | 0.61±0.16 | 4.95±0.63  | 3.25±1.07 | st         |
| <b>KL</b> | 51.1      |           |           |            |           |            |

**Table S2** - Results from the karyomorphometrical analyses of *Solenopsis saevissima*  $2n = 32$  chromosomes. TL: total length; L: long arm length; S: short arm length; RL: relative length;  $r$ : arm ratio ( $= L/S$ ); m: metacentric; sm: submetacentric; st: subtelocentric.

|   | TL        | L         | S         | RL        | $r$       | Morphology |
|---|-----------|-----------|-----------|-----------|-----------|------------|
| 1 | 2.86±0.71 | 1.57±0.40 | 1.28±0.34 | 4.14±0.29 | 1.23±0.19 | m          |
| 1 | 2.77±0.62 | 1.52±0.36 | 1.24±0.29 | 4.03±0.21 | 1.23±0.17 | m          |
| 2 | 2.56±0.64 | 1.37±0.32 | 1.19±0.33 | 3.71±0.22 | 1.16±0.15 | m          |
| 2 | 2.63±0.69 | 1.45±0.40 | 1.18±0.32 | 3.82±0.29 | 1.23±0.18 | m          |
| 3 | 2.43±0.70 | 1.35±0.40 | 1.07±0.32 | 3.51±0.38 | 1.27±0.18 | m          |
| 3 | 2.60±0.80 | 1.42±0.40 | 1.16±0.42 | 3.72±0.44 | 1.25±0.15 | m          |
| 4 | 2.33±0.67 | 1.30±0.41 | 1.02±0.28 | 3.37±0.41 | 1.27±0.21 | m          |
| 4 | 2.23±0.56 | 1.19±0.26 | 1.04±0.3  | 3.24±0.32 | 1.16±0.11 | m          |
| 5 | 2.24±0.66 | 1.21±0.42 | 1.02±0.26 | 3.23±0.35 | 1.17±0.20 | m          |
| 5 | 2.18±0.62 | 1.16±0.34 | 1.02±0.29 | 3.15±0.36 | 1.14±0.10 | m          |
| 6 | 2.13±0.53 | 1.13±0.26 | 0.99±0.28 | 3.1±0.39  | 1.16±0.20 | m          |
| 6 | 2.04±0.60 | 1.18±0.36 | 0.86±0.24 | 2.95±0.31 | 1.37±0.18 | m          |
| 7 | 2.11±0.60 | 1.17±0.34 | 0.93±0.27 | 3.03±0.28 | 1.25±0.13 | m          |
| 7 | 2.14±0.62 | 1.17±0.35 | 0.97±0.27 | 3.08±0.33 | 1.19±0.14 | m          |
| 8 | 1.88±0.53 | 1.07±0.36 | 0.8±0.18  | 2.73±0.38 | 1.34±0.24 | m          |
| 8 | 1.95±0.56 | 1.07±0.36 | 0.88±0.23 | 2.82±0.3  | 1.19±0.23 | m          |
| 9 | 2.04±0.62 | 1.12±0.39 | 0.91±0.24 | 2.95±0.47 | 1.23±0.20 | m          |
| 9 | 1.87±0.35 | 1.05±0.21 | 0.82±0.15 | 2.77±0.42 | 1.28±0.19 | m          |

|           | TL         | L         | S         | RL        | r         | Morphology |
|-----------|------------|-----------|-----------|-----------|-----------|------------|
| 10        | 1.51±0.44  | 0.84±0.21 | 0.67±0.23 | 2.18±0.29 | 1.28±0.16 | m          |
| 10        | 1.50±0.48  | 0.85±0.26 | 0.65±0.23 | 2.17±0.31 | 1.35±0.21 | m          |
| 11        | 2.63±0.67  | 1.80±0.49 | 0.82±0.21 | 3.82±0.41 | 2.19±0.37 | sm         |
| 11        | 2.55±0.66  | 1.75±0.48 | 0.80±0.21 | 3.70±0.44 | 2.21±0.35 | sm         |
| 12        | 2.10±0.52  | 1.41±0.34 | 0.68±0.20 | 3.06±0.50 | 2.14±0.4  | sm         |
| 12        | 2.06±0.53  | 1.39±0.37 | 0.66±0.19 | 2.99±0.43 | 2.14±0.39 | sm         |
| 13        | 1.87±0.47  | 1.28±0.34 | 0.58±0.12 | 2.71±0.36 | 2.2±0.19  | sm         |
| 13        | 1.89±0.51  | 1.28±0.36 | 0.60±0.16 | 2.74±0.49 | 2.14±0.25 | sm         |
| 14        | 1.84±0.48  | 1.25±0.32 | 0.58±0.18 | 2.69±0.61 | 2.17±0.27 | sm         |
| 14        | 1.76±0.41  | 1.20±0.29 | 0.56±0.12 | 2.57±0.4  | 2.14±0.14 | sm         |
| 15        | 2.53±0.65  | 1.97±0.55 | 0.55±0.12 | 3.66±0.39 | 3.54±0.5  | st         |
| 15        | 2.56±0.79  | 2.02±0.64 | 0.54±0.17 | 3.68±0.39 | 3.76±0.57 | st         |
| 16        | 1.77±0.82  | 1.36±0.62 | 0.40±0.19 | 2.47±0.53 | 3.42±0.37 | st         |
| 16        | 1.79±0.76  | 1.37±0.59 | 0.41±0.18 | 2.51±0.42 | 3.4±0.92  | st         |
| <b>KL</b> | 69.4742481 |           |           |           |           |            |

**Table S3** - Results from the karyomorphometrical analyses of *Solenopsis saevissima* 4n = 64 chromosomes. TL: total length; L: long arm length; S: short arm length; RL: relative length; r: arm ratio (= L/S); m: metacentric; sm: submetacentric; st: subtelocentric.

|   | TL   | L    | S    | RL   | r    | Morphology |
|---|------|------|------|------|------|------------|
| 1 | 2.15 | 1.29 | 0.86 | 1.00 | 1.50 | m          |
| 1 | 2.23 | 1.37 | 0.87 | 1.03 | 1.58 | m          |
| 1 | 2.23 | 1.33 | 0.90 | 1.03 | 1.48 | m          |
| 1 | 2.21 | 1.39 | 0.82 | 1.02 | 1.69 | m          |
| 2 | 2.15 | 1.15 | 1.01 | 1.00 | 1.14 | m          |
| 2 | 1.73 | 0.95 | 0.78 | 0.80 | 1.22 | m          |
| 2 | 1.87 | 0.94 | 0.93 | 0.86 | 1.01 | m          |
| 2 | 1.79 | 1.11 | 0.68 | 0.83 | 1.63 | m          |
| 3 | 1.98 | 1.09 | 0.89 | 0.92 | 1.23 | m          |
| 3 | 2.06 | 1.08 | 0.98 | 0.95 | 1.11 | m          |
| 3 | 1.66 | 0.85 | 0.81 | 0.77 | 1.04 | m          |
| 3 | 1.83 | 0.98 | 0.85 | 0.85 | 1.16 | m          |
| 4 | 1.85 | 1.00 | 0.84 | 0.85 | 1.19 | m          |
| 4 | 1.89 | 1.04 | 0.85 | 0.88 | 1.22 | m          |
| 4 | 1.89 | 1.00 | 0.89 | 0.88 | 1.13 | m          |
| 4 | 2.13 | 1.14 | 0.99 | 0.99 | 1.15 | m          |
| 5 | 1.94 | 1.01 | 0.93 | 0.90 | 1.08 | m          |
| 5 | 2.00 | 1.10 | 0.90 | 0.92 | 1.23 | m          |
| 5 | 1.90 | 1.05 | 0.85 | 0.88 | 1.23 | m          |
| 5 | 1.94 | 0.98 | 0.96 | 0.90 | 1.02 | m          |
| 6 | 1.76 | 0.99 | 0.77 | 0.82 | 1.28 | m          |
| 6 | 1.73 | 1.04 | 0.70 | 0.80 | 1.48 | m          |
| 6 | 1.90 | 0.99 | 0.91 | 0.88 | 1.09 | m          |
| 6 | 1.93 | 0.99 | 0.94 | 0.89 | 1.05 | m          |
| 7 | 1.85 | 1.03 | 0.82 | 0.86 | 1.26 | m          |
| 7 | 1.68 | 0.93 | 0.75 | 0.78 | 1.24 | m          |

|           | <b>TL</b> | <b>L</b> | <b>S</b> | <b>RL</b> | <b>r</b> | <b>Morphology</b> |
|-----------|-----------|----------|----------|-----------|----------|-------------------|
| 7         | 1.56      | 0.81     | 0.75     | 0.72      | 1.09     | m                 |
| 7         | 1.60      | 0.87     | 0.73     | 0.74      | 1.20     | m                 |
| 8         | 1.62      | 0.97     | 0.65     | 0.75      | 1.48     | m                 |
| 8         | 1.62      | 0.88     | 0.74     | 0.75      | 1.19     | m                 |
| 8         | 1.62      | 0.87     | 0.75     | 0.75      | 1.16     | m                 |
| 8         | 1.43      | 0.89     | 0.54     | 0.66      | 1.63     | m                 |
| 9         | 1.43      | 0.89     | 0.54     | 0.66      | 1.64     | m                 |
| 9         | 1.65      | 0.83     | 0.82     | 0.76      | 1.00     | m                 |
| 9         | 1.54      | 0.93     | 0.61     | 0.71      | 1.52     | m                 |
| 9         | 1.35      | 0.77     | 0.58     | 0.62      | 1.34     | m                 |
| 10        | 1.32      | 0.74     | 0.59     | 0.61      | 1.25     | m                 |
| 10        | 1.35      | 0.82     | 0.52     | 0.62      | 1.57     | m                 |
| 10        | 1.35      | 0.78     | 0.57     | 0.63      | 1.36     | m                 |
| 10        | 1.20      | 0.65     | 0.55     | 0.56      | 1.17     | m                 |
| 11        | 2.49      | 1.82     | 0.67     | 1.15      | 2.74     | sm                |
| 11        | 2.70      | 1.94     | 0.76     | 1.25      | 2.53     | sm                |
| 11        | 2.08      | 1.47     | 0.61     | 0.96      | 2.40     | sm                |
| 11        | 2.02      | 1.41     | 0.61     | 0.94      | 2.29     | sm                |
| 12        | 1.41      | 1.01     | 0.39     | 0.65      | 2.58     | sm                |
| 12        | 1.46      | 0.99     | 0.47     | 0.68      | 2.11     | sm                |
| 12        | 1.47      | 0.97     | 0.50     | 0.68      | 1.96     | sm                |
| 12        | 1.30      | 0.84     | 0.47     | 0.60      | 1.80     | sm                |
| 13        | 1.40      | 0.90     | 0.50     | 0.65      | 1.80     | sm                |
| 13        | 1.43      | 0.93     | 0.50     | 0.66      | 1.85     | sm                |
| 13        | 1.31      | 0.84     | 0.47     | 0.61      | 1.81     | sm                |
| 13        | 1.29      | 0.83     | 0.46     | 0.59      | 1.79     | sm                |
| 14        | 1.05      | 0.68     | 0.37     | 0.49      | 1.87     | sm                |
| 14        | 0.97      | 0.71     | 0.26     | 0.45      | 2.67     | sm                |
| 14        | 1.19      | 0.84     | 0.35     | 0.55      | 2.41     | sm                |
| 14        | 1.06      | 0.76     | 0.30     | 0.49      | 2.54     | sm                |
| 15        | 1.98      | 1.49     | 0.49     | 0.92      | 3.05     | st                |
| 15        | 1.71      | 1.29     | 0.42     | 0.79      | 3.10     | st                |
| 15        | 1.86      | 1.42     | 0.44     | 0.86      | 3.25     | st                |
| 15        | 1.79      | 1.42     | 0.38     | 0.83      | 3.77     | st                |
| 16        | 1.39      | 1.06     | 0.32     | 0.64      | 3.32     | st                |
| 16        | 1.50      | 1.17     | 0.33     | 0.69      | 3.57     | st                |
| 16        | 1.31      | 1.02     | 0.2293   | 0.61      | 3.52     | st                |
| 16        | 1.32      | 1.01     | 0.31     | 0.61      | 3.23     | st                |
| <b>KL</b> | 215.98    |          |          |           |          |                   |

**Table S4** – Chromosome counts frequency by individual and colony of *Solenopsis saevissima*.

| Colony | Counting date | Slide/Individual | n chromosomes | frequency | ploidy |
|--------|---------------|------------------|---------------|-----------|--------|
| N1     | 22/10/2020    | L3               | 13            | 1         |        |
|        |               |                  | 19            | 1         |        |
|        |               |                  | 30            | 1         |        |
| N1     | 22/10/2020    | L6               | 10            | 1         |        |
|        |               |                  | 11            | 1         |        |
|        |               |                  | 12            | 2         |        |
|        |               |                  | 13            | 1         |        |
|        |               |                  | 14            | 1         |        |
|        |               |                  | 16            | 3         | 1n     |
|        |               |                  | 18            | 1         |        |
|        |               |                  | 19            | 1         |        |
|        |               |                  | 20            | 1         |        |
|        |               |                  | 23            | 1         |        |
|        |               |                  | 24            | 1         |        |
|        |               |                  | 25            | 2         |        |
|        |               |                  | 26            | 4         |        |
|        |               |                  | 27            | 1         |        |
|        |               |                  | 28            | 4         |        |
|        |               |                  | 29            | 1         |        |
|        |               |                  | 30            | 3         |        |
|        |               |                  | 31*           | 4         |        |
|        |               |                  | 32*           | 20        | 2n     |
|        |               |                  | 33            | 1         |        |
|        |               |                  | 34            | 1         |        |
|        |               |                  | 40            | 1         |        |
|        |               |                  | 47            | 1         |        |
|        |               |                  | 50*           | 2         |        |
|        |               |                  | 51            | 1         |        |
|        |               |                  | 53*           | 2         |        |
|        |               |                  | 54            | 1         |        |
|        |               |                  | 57            | 1         |        |
|        |               |                  | 59            | 4         |        |
|        |               |                  | 60*           | 3         |        |
|        |               |                  | 61*           | 2         |        |
|        |               |                  | 62            | 1         |        |
|        |               |                  | 63            | 3         |        |
| 64     | 2             | 4n               |               |           |        |
|        |               | 124              | 1             |           |        |
|        |               | 128              | 1             | 8n        |        |
| N1     | 22/10/2020    | L7               | 16            | 1         | 1n     |
|        |               |                  | 17            | 1         |        |
|        |               |                  | 21            | 1         |        |

| Colony | Counting date | Slide/Individual | n chromosomes | frequency | ploidy |
|--------|---------------|------------------|---------------|-----------|--------|
|        |               |                  | 23            | 1         |        |
|        |               |                  | 31            | 1         |        |
|        |               |                  | 32            | 3         | 2n     |
|        |               |                  | 29*           | 1         |        |
| N1     | 26/10/2020    | L1               | 12            | 1         |        |
|        |               |                  | 20            | 1         |        |
|        |               |                  | 30            | 1         |        |
|        |               |                  | 31            | 1         |        |
|        |               |                  | 32            | 4         | 2n     |
| N1     | 26/10/2020    | L2               | 20            | 1         |        |
|        |               |                  | 21            | 1         |        |
|        |               |                  | 22            | 1         |        |
|        |               |                  | 24            | 1         |        |
|        |               |                  | 25            | 1         |        |
|        |               |                  | 28            | 1         |        |
|        |               |                  | 29            | 6         |        |
|        |               |                  | 30            | 1         |        |
|        |               |                  | 32            | 4         | 2n     |
|        |               |                  | 61            | 2         |        |
| N1     | 26/10/2020    | L3               | 20            | 1         |        |
|        |               |                  | 21            | 1         |        |
|        |               |                  | 27            | 1         |        |
|        |               |                  | 28            | 1         |        |
|        |               |                  | 29            | 1         |        |
|        |               |                  | 30            | 1         |        |
|        |               |                  | 32            | 11        | 2n     |
| N1     | 26/10/2020    | L4               | 5             | 1         |        |
|        |               |                  | 10            | 1         |        |
|        |               |                  | 19            | 1         |        |
|        |               |                  | 24            | 1         |        |
|        |               |                  | 28            | 1         |        |
|        |               |                  | 30            | 3         |        |
|        |               |                  | 31            | 1         |        |
|        |               |                  | 32            | 5         | 2n     |
|        |               |                  | 48            | 1         | 3n     |
|        |               |                  | 54            | 1         |        |
|        |               |                  | 60            | 1         |        |
|        |               |                  | 63            | 1         |        |
|        |               |                  | 64            | 1         | 4n     |
|        |               |                  | 65            | 1         |        |
| N3     | 01/04/2021    | L8               | 27            | 1         |        |
|        |               |                  | 30            | 2         |        |
|        |               |                  | 32            | 1         | 2n     |

| Colony | Counting date | Slide/Individual | n chromosomes | frequency | ploidy |
|--------|---------------|------------------|---------------|-----------|--------|
|        |               |                  | 64            | 1         | 4n     |
| N4     | 17/11/2021    | L3               | 30            | 2         |        |
|        |               |                  | 31            | 1         |        |
|        |               |                  | 32            | 4         | 2n     |
|        |               |                  | 34            | 1         |        |
| N4     | 17/11/2021    | L5               | 12            | 1         |        |
|        |               |                  | 16            | 2         | 1n     |
|        |               |                  | 19            | 1         |        |
|        |               |                  | 20            | 1         |        |
|        |               |                  | 27            | 1         |        |
|        |               |                  | 28            | 1         |        |
|        |               |                  | 29            | 3         |        |
|        |               |                  | 31            | 2         |        |
|        |               |                  | 32            | 2         | 2n     |
|        |               |                  | 60            | 1         |        |
|        |               |                  | 64            | 3         | 4n     |
|        |               |                  | 120           | 1         |        |
|        |               |                  | 128           | 1         | 8n     |
| N4     | 17/11/2021    | L6               | 28            | 2         |        |
|        |               |                  | 29            | 7         |        |
|        |               |                  | 30            | 2         |        |
|        |               |                  | 31            | 8         |        |
|        |               |                  | 32            | 19        | 2n     |
|        |               |                  | 33            | 1         |        |
|        |               |                  | 34            | 1         |        |
|        |               |                  | 35            | 1         |        |
|        |               |                  | 41            | 1         |        |
|        |               |                  | 42            | 1         |        |
|        |               |                  | 45            | 1         |        |
|        |               |                  | 47            | 1         |        |
|        |               |                  | 51            | 1         |        |
|        |               |                  | 53            | 1         |        |
|        |               |                  | 55            | 3         |        |
|        |               |                  | 59            | 1         |        |
|        |               |                  | 60            | 2         |        |
|        |               |                  | 61            | 4         |        |
|        |               |                  | 62            | 2         |        |
|        |               |                  | 63            | 2         |        |
|        |               |                  | 64            | 6         | 4n     |
|        |               |                  | 101           | 1         |        |
|        |               |                  | 106           | 1         |        |
|        |               |                  | 120           | 1         |        |
|        |               |                  | 124           | 1         |        |

| Colony | Counting date | Slide/Individual | n chromosomes | frequency | ploidy |
|--------|---------------|------------------|---------------|-----------|--------|
|        |               |                  | 125           | 1         |        |
|        |               |                  | 128           | 1         | 8n     |
| N4     | 17/11/2021    | L8               | 11            | 1         |        |
|        |               |                  | 13            | 2         |        |
|        |               |                  | 14            | 3         |        |
|        |               |                  | 15            | 5         |        |
|        |               |                  | 16            | 16        | 1n     |
|        |               |                  | 17            | 4         |        |
|        |               |                  | 18            | 2         |        |
|        |               |                  | 20            | 2         |        |
|        |               |                  | 21            | 1         |        |
|        |               |                  | 24            | 2         |        |
|        |               |                  | 25            | 3         |        |
|        |               |                  | 26            | 3         |        |
|        |               |                  | 27            | 2         |        |
|        |               |                  | 28            | 5         |        |
|        |               |                  | 29            | 4         |        |
|        |               |                  | 30            | 2         |        |
|        |               |                  | 31            | 9         |        |
|        |               |                  | 32            | 10        | 2n     |
|        |               |                  | 35            | 1         |        |
|        |               |                  | 36            | 1         |        |
|        |               |                  | 37            | 1         |        |
|        |               |                  | 40            | 1         |        |
|        |               |                  | 52            | 1         |        |
|        |               |                  | 54            | 1         |        |
|        |               |                  | 56            | 1         |        |
|        |               |                  | 57            | 1         |        |
|        |               |                  | 58            | 1         |        |
|        |               |                  | 59            | 2         |        |
|        |               |                  | 60            | 2         |        |
|        |               |                  | 61            | 4         |        |
|        |               |                  | 62            | 4         |        |
|        |               |                  | 63            | 2         |        |
|        |               |                  | 64            | 13        | 4n     |
|        |               |                  | 65            | 1         |        |
|        |               |                  | 68            | 1         |        |
|        |               |                  | 124           | 1         |        |
|        |               |                  | 125           | 1         |        |
| N5     | 08/12/2021    | L2               | 12            | 1         |        |
|        |               |                  | 14            | 1         |        |
|        |               |                  | 15            | 1         |        |
|        |               |                  | 18            | 1         |        |

| Colony | Counting date | Slide/Individual | n chromosomes | frequency | ploidy |
|--------|---------------|------------------|---------------|-----------|--------|
|        |               |                  | 20            | 2         |        |
|        |               |                  | 22            | 1         |        |
|        |               |                  | 24            | 1         |        |
|        |               |                  | 26            | 2         |        |
|        |               |                  | 27            | 2         |        |
|        |               |                  | 28            | 1         |        |
|        |               |                  | 29            | 3         |        |
|        |               |                  | 30            | 5         |        |
|        |               |                  | 31            | 7         |        |
|        |               |                  | 32            | 17        | 2n     |
|        |               |                  | 34            | 1         |        |
|        |               |                  | 42            | 1         |        |
|        |               |                  | 63            | 1         |        |
|        |               |                  | 64            | 1         | 4n     |
| N5     | 10/12/21      | L4               | 25            | 1         |        |
|        |               |                  | 26            | 1         |        |
|        |               |                  | 27            | 2         |        |
|        |               |                  | 29            | 1         |        |
|        |               |                  | 30            | 2         |        |
|        |               |                  | 31            | 1         |        |
|        |               |                  | 32            | 7         | 2n     |
|        |               |                  | 42            | 1         |        |
|        |               |                  | 64            | 1         | 4n     |
| N5     | 10/12/21      | L5               | 25            | 1         |        |
|        |               |                  | 32            | 4         | 2n     |
|        |               |                  | 33            | 1         |        |
|        |               |                  | 67            | 1         |        |
| N5     | 10/12/21      | L8               | 29            | 1         |        |
|        |               |                  | 30            | 1         |        |
|        |               |                  | 31            | 1         |        |
|        |               |                  | 32            | 2         | 2n     |
|        |               |                  | 37            | 1         |        |
